# Supplementary material
Source: MDPI journal article supplement (https://www.mdpi.com/2073-4344/13/4/703)
Supplement: s1 [file s1]

**Catalysts**  
**Supporting Information**

*Asymmetric Synthesis of trans-3-Alkoxyamine-4-Oxygenated-2-Piperidinones Mediated  
by Transition-Metal-Free Dual C-H Oxidation and its CAL-B-Assisted Enzymatic  
Resolution*

**Julio Romero-Ibañez<sup>1</sup>, Marina A. Ortega-Rojas<sup>2</sup>, Luis G. Hernández-Vazquez<sup>2</sup>,  
Jonathan R. Valdéz-Camacho<sup>2</sup>Fernando Sartillo-Piscil<sup>1,\*</sup>, and Jaime Escalante<sup>2,\*</sup>**

**Table of contents:**

|                                                                                                                                                             |             |
|-------------------------------------------------------------------------------------------------------------------------------------------------------------|-------------|
| <b>General considerations.....</b>                                                                                                                          | <b>S-3</b>  |
| <b>Experimental section and characterization data .....</b>                                                                                                 | <b>S-4</b>  |
| <b>NMR Spectra .....</b>                                                                                                                                    | <b>S-8</b>  |
| NMR spectra for 1-Benzyl-2-oxo-3-((2,2,6,6-tetramethylpiperidin-1-yl)oxy)piperidin-4-yl acetate (rac- <i>trans</i> - <b>2</b> ).....                        | <b>S-9</b>  |
| NMR spectra for (3 <i>S</i> ,4 <i>R</i> )-1-benzyl-4-hydroxy-3-((2,2,6,6-tetramethylpiperidin-1-yl)oxy)piperidin-2-one (( <i>u</i> )- <i>trans</i> -3)..... | <b>S-10</b> |
| NMR spectra for ( <i>S</i> )-1-Benzyl-2-oxopyrrolidin-3-yl acetate ( <i>S</i> -4) .....                                                                     | <b>S-14</b> |
| NMR spectra for ( <i>S</i> )-1-Benzyl-3-hydroxypyrrolidin-2-one ( <i>S</i> -5) .....                                                                        | <b>S-16</b> |
| <b>Figures.....</b>                                                                                                                                         | <b>S-18</b> |

**S1.** Schematic representation for strategy a) resolution of the *rac-trans*-3 as the second substrate (for the fast-reacting enantiomer (3*S*,4*R*)-3) and strategy b) resolution of the *rac-trans*-2 intermediate as the first substrate (for the fast-reacting enantiomer (3*S*,4*R*)-2).S-18

## General considerations

Commercially available reagents were used without further purification. All reactions were carried out under an inert argon atmosphere with dry solvents under anhydrous conditions unless otherwise noted. *Candida antarctica* lipase B (CAL-B) was obtained as Novozym<sup>®</sup> 435 (Novozymes Mexico). Solvents were used as technical grade and freshly distilled prior to use. Column chromatography (CC) was performed using silica gel (230-400 mesh) with solvents indicated in the text. Analytical grade solvents were purchased from Tecsiquim (*i*-PrOH), Caledon Laboratory Chemicals (*n*-hexane). NMR spectra were recorded with Bruker-500 (500 MHz) using as references: TMS for <sup>1</sup>H (0.0 ppm) and CDCl<sub>3</sub> for <sup>13</sup>C (77.16 ppm); chemical shifts (*δ*) are reported in parts per million (ppm) and Hz for the coupling constants (*J*). The following abbreviations (or combinations thereof) were used to explain the multiplicities: s = singlet, d = doublet, t = triplet, q = quartet, m = multiplet, and br = broadened. Melting points were not corrected and carried out using a Fisher-Scientific 12-144 melting point apparatus. Optical rotations were measured with an Autopol-III polarimeter using the sodium D line (589 nm).

## Experimental section and characterization data

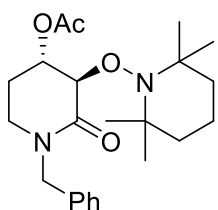

### Method for 1-Benzyl-2-oxo-3-((2,2,6,6-tetramethylpiperidin-1-yl)oxy)piperidin-4-yl acetate (*rac-trans*-2):

To a solution of 4-hydroxy-3-alkoxyaminolactam *rac-trans*-3 (1.2 g, 3.33 mmol) and 4-DMAP (0.4 g, 3.33 mmol) in 33.3 mL of anhydrous CH<sub>2</sub>Cl<sub>2</sub> at 0 °C was added NEt<sub>3</sub> (0.5 g, 5.0 mmol) and acetic anhydride (1.02 g, 10 mmol). After 5 minutes, the reaction mixture was left to warm and stirred for 1 hour. Afterward, 20 mL of water was added, and both phases were separated. The aqueous phase was extracted with CH<sub>2</sub>Cl<sub>2</sub> (25 mL × 3). The combined organic phases were dried (Na<sub>2</sub>SO<sub>4</sub>), and the solvent was removed under reduced pressure. The residue was purified using column chromatography [SiO<sub>2</sub>, hexanes:EtOAc, 5:1] to give 1.2 g (90%) of *rac-trans*-2 as a white solid. M.p.: 73-74 °C; <sup>1</sup>H NMR (500 MHz, CDCl<sub>3</sub>) δ: 1.13 (br s, 6H), 1.25 (br s, 6H), 1.31-1.35 (m, 1H), 1.47-1.52 (br m, 5H), 1.90-1.95 (m, 1H), 2.01 (s, 3H), 2.28-2.35 (m, 1H), 3.21 (ddd, *J* = 12.5, 9.5, 6.0 Hz, 1H), 3.30 (ddd, *J* = 12.5, 7.5, 3.5 Hz, 1H), 4.29 (d, *J* = 15.0 Hz, 1H), 4.38 (d, *J* = 2.0 Hz, 1H), 4.94 (d, *J* = 15.0 Hz, 1H), 5.42 (q, *J* = 3.5 Hz, 1H), 7.25-7.33 (m, 5H); <sup>13</sup>C NMR (125 MHz, CDCl<sub>3</sub>) δ: 17.2, 20.3, 20.7, 21.1, 23.0, 33.3, 33.9, 40.4(2C), 42.2, 50.1, 60.6(2C), 69.2, 80.7, 127.5,

128.2(2C), 128.6(2C), 136.9, 167.4, 169.9. HRMS (FAB<sup>+</sup>) *m/z*: [M+H]<sup>+</sup> Calcd for

C<sub>23</sub>H<sub>35</sub>N<sub>2</sub>O<sub>4</sub><sup>+</sup> *m/z*: 403.5350, Found 403.2599.

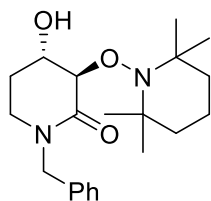

**Method for (3S,4R)-1-benzyl-4-hydroxy-3-((2,2,6,6-**

**tetramethylpiperidin-1-yl)oxy)piperidin-2-one ((*u*)-*trans*-3).** Enzymatic de-

acylation reactions were carried out in sealed glass vials. The reactions consisted of

the preparation of a solution of rac-*trans*-**2** 0.2 M in 2M2B, 2 to 4 equivalents of water,

and 20 to 100 mg mL<sup>-1</sup> of CAL-B (Novozym® 435). The reaction mixtures were

stirred in a thermostated water bath at 45 °C or 60°C. At the end of the reaction, the

enzyme was filtered off and washed with DCM. The solvent was evaporated in a

vacuum. The residue was purified using column chromatography [SiO<sub>2</sub>, Hex:EtOAc;

95:05 to 60:40] to give the product (*u*)-*trans*-**3** as a white solid. Yield 39%; [ $\alpha$ ]<sub>D</sub><sup>20</sup> =

+45.2 (*c* 1.0, CHCl<sub>3</sub>) for the product obtained at 60°C. Spectral data for <sup>1</sup>H and <sup>13</sup>C

NMR are consistent with the literature [**Error! Bookmark not defined.**].  $\delta$ : 1.21-1.87

(m, 18H), 2.06 (dq, *J* = 13.5, 3.8 Hz, 1H), 3.14-3.24 (m, 2H), 4.28 (d, *J* = 14.6 Hz, 1H),

4.33 (m, 1H), 4.53 (d, *J* = 8.7 Hz, 1H), 4.83 (d, *J* = 14.6 Hz, 1H), 6.37 (br, 1H), 7.23-7.38

(m, 5H); <sup>13</sup>C NMR (125 MHz, CDCl<sub>3</sub>)  $\delta$ : 17.2, 20.3, 20.7, 21.1, 23.0, 33.3, 33.9, 40.4(2C),

42.2, 50.1, 60.6(2C), 69.2, 80.7, 127.5, 128.2(2C), 128.6(2C), 136.9, 167.4, 169.9 HRMS

(FAB<sup>+</sup>) *m/z*: [M+H]<sup>+</sup> Calcd for C<sub>21</sub>H<sub>33</sub>N<sub>2</sub>O<sub>3</sub><sup>+</sup> *m/z*: 361.4680, Found 361.2516.

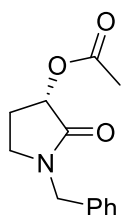

**Method for (S)-1-Benzyl-2-oxopyrrolidin-3-yl acetate (S-4):** To an enantioenriched solution of (*u*)-trans-2 (0.1 g, 0.25 mmol) in 8.3 mL of Et<sub>2</sub>O at 0 °C was added *m*-CPBA (77%; 0.17 g, 0.75 mmol) slowly. After 10 minutes of stirring at this temperature, NEt<sub>3</sub> (0.23 g, 2.25 mmol) and 5 mL of H<sub>2</sub>O were added. The phases were separated, and the aqueous phase was extracted with Et<sub>2</sub>O (3 × 8 mL). The combined organic phases were dried with Na<sub>2</sub>SO<sub>4</sub>, and the solvent was removed under reduced pressure. The residue was purified using column chromatography [SiO<sub>2</sub>, hexanes/EtOAc; 4:1 until TEMPO came out of the column, then 1:1] to give 23.9 mg (50%) of *S*-4 as a colorless oil.  $[\alpha]_D^{25} = -36.0$  (*c* = 1.0, CHCl<sub>3</sub>); <sup>1</sup>H NMR (500 MHz, CDCl<sub>3</sub>) δ: 1.93 (tdd, *J* = 13.5, 9.5, 8.0 Hz, 1H), 2.16 (s, 3H), 2.50-2.56 (m, 1H), 3.21 (dt, *J* = 10.0, 7.5 Hz, 1H), 3.29 (td, *J* = 9.5, 2.5 Hz, 1H), 4.45 (d, *J* = 14.5 Hz, 1H), 4.54 (d, *J* = 14.5 Hz, 1H), 5.35 (t, *J* = 8.0 Hz, 1H), 7.24-7.36 (m, 5H); <sup>13</sup>C NMR (125 MHz, CDCl<sub>3</sub>) δ: 21.1, 26.1, 43.1, 47.2, 71.4, 128.0, 128.4(2C), 129.0(2C), 135.7, 170.2, 170.5.

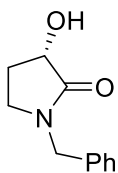

**Method for (S)-1-Benzyl-3-hydroxypyrrolidin-2-one (S-5):** To a solution

of *S*-4 (0.02 g, 0.086 mmol) in 2.9 mL of THF:H<sub>2</sub>O (2:1) at 0 °C was added

LiOH (6.2 mg, 0.26 mmol). The reaction mixture was stirred and

monitored with TLC. Upon completion, an aqueous solution of KHSO<sub>4</sub> was added

until a pH of 1-2 was reached. Then, 10 mL of Et<sub>2</sub>O was added, the phases were

separated, and the aqueous phase was extracted with Et<sub>2</sub>O (3 × 10 mL). The

combined organic phases were dried with Na<sub>2</sub>SO<sub>4</sub>, and the solvent was removed

under reduced pressure. The residue was purified using column chromatography

[SiO<sub>2</sub>, EtOAc:EtOH; 1:2] to give 13 mg (79%) of *S*-5 as a white solid. M.p.: 69-70 °C;

$[\alpha]_D^{25} = -79.0$  (*c* = 0.55, CHCl<sub>3</sub>); <sup>1</sup>H NMR (500 MHz, CDCl<sub>3</sub>) δ: 1.91-1.99 (m, 1H), 2.39-

2.45 (m, 1H), 3.15-3.27 (m, 2H), 4.01 (br, 1H), 4.41-4.51 (m, 3H), 7.23-7.35 (m, 5H); <sup>13</sup>C

NMR (125 MHz, CDCl<sub>3</sub>) δ: 27.9, 43.2, 47.2, 70.2, 127.9, 128.3(2C), 128.9(2C), 135.8,

175.0.

.

# NMR Spectra

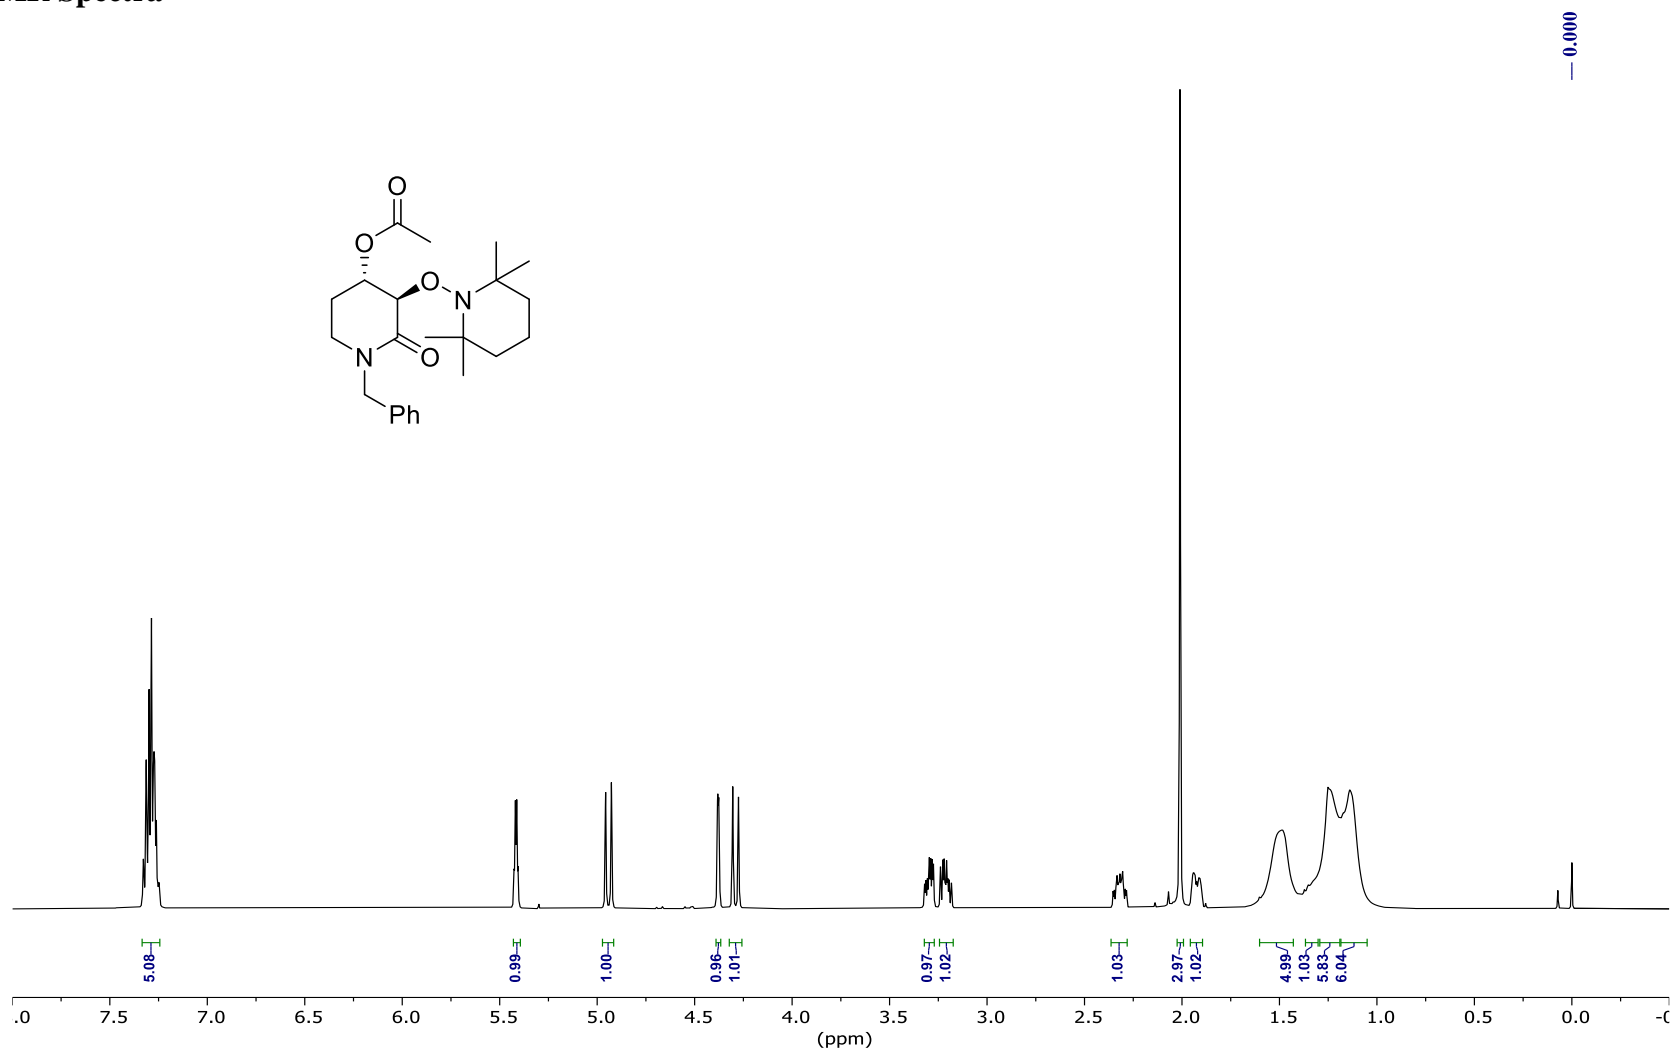



NMR spectra for 1-Benzyl-2-oxo-3-((2,2,6,6-tetramethylpiperidin-1-yl)oxy)piperidin-4-yl acetate (*rac-trans*-2):  $^1\text{H}$ -NMR (500 MHz,  $\text{CDCl}_3$ ).

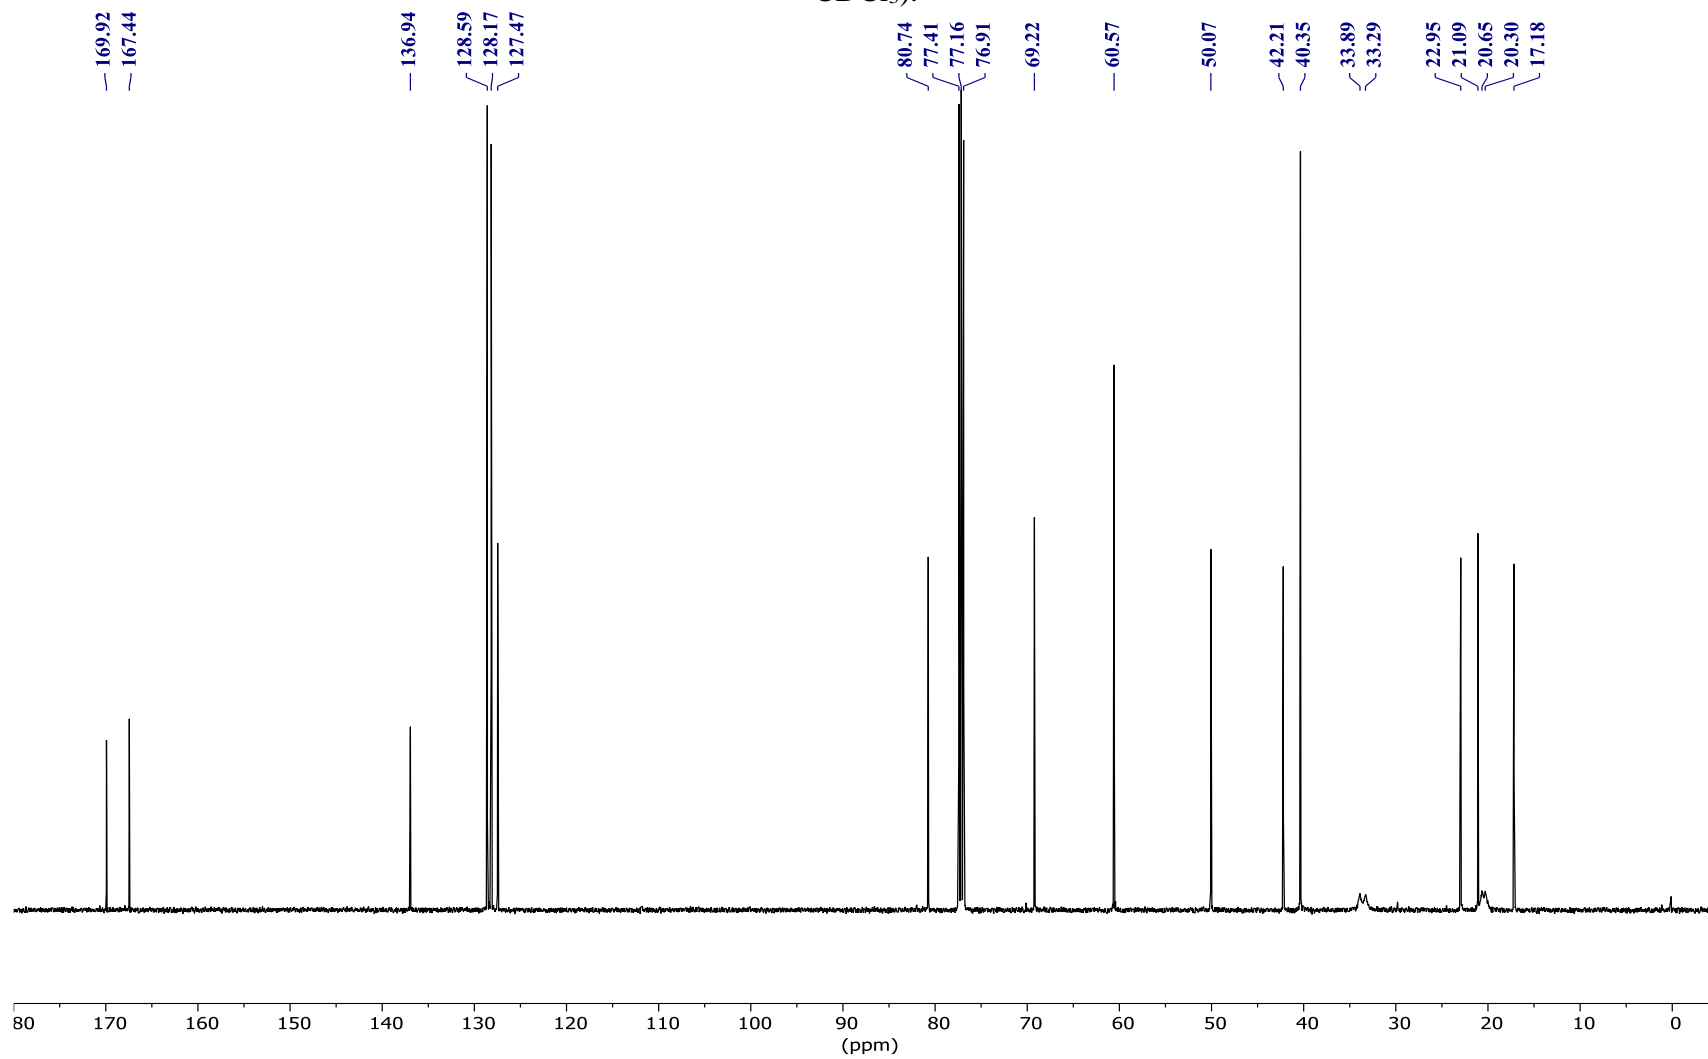

NMR spectra for 1-Benzyl-2-oxo-3-((2,2,6,6-tetramethylpiperidin-1-yl)oxy)piperidin-4-yl acetate (*rac-trans*-2):  $^{13}\text{C}$ -NMR (125 MHz,  $\text{CDCl}_3$ ).

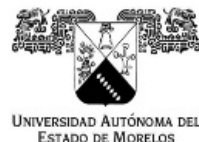

**Servicio de Espectrometría de Masas**  
**MStation JMS-700 JEOL Alta Resolución**  
Centro de Investigaciones Químicas UAEM  
Tel. 329-79-97 ext.6013

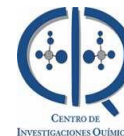

[ Elemental Composition ]

Data : JEG004

Date : 07-Oct-2021 10:04

Sample: JEG16-1P01

Operator name M.en ITA Victoria Labastida G.

Note : Dr.Escalante/ Centro de Investigaciones Químicas UAEM

Inlet : Direct

Ion Mode : FAB+

RT : 0.19 min

Scan#: (2,8)+37+39

Elements : C 40/0, H 49/0, O 4/0, N 2/0

Mass Tolerance : 1000ppm, 3mmu if m/z < 3, 5mmu if m/z > 5

Unsaturation (U.S.) : -0.5 - 10.0

| Observed m/z | Int% | Err[ppm / mmu] | U.S. | Composition |
|--------------|------|----------------|------|-------------|
|--------------|------|----------------|------|-------------|

|          |       |             |     |                   |
|----------|-------|-------------|-----|-------------------|
| 403.2599 | 100.0 | +0.4 / +0.2 | 7.5 | C 23 H 35 O 4 N 2 |
|----------|-------|-------------|-----|-------------------|

NMR spectra for 1-Benzyl-2-oxo-3-((2,2,6,6-tetramethylpiperidin-1-yl)oxy)piperidin-4-yl acetate (*rac-trans*-2): HRMS ( $\text{Fab}^+$ ).

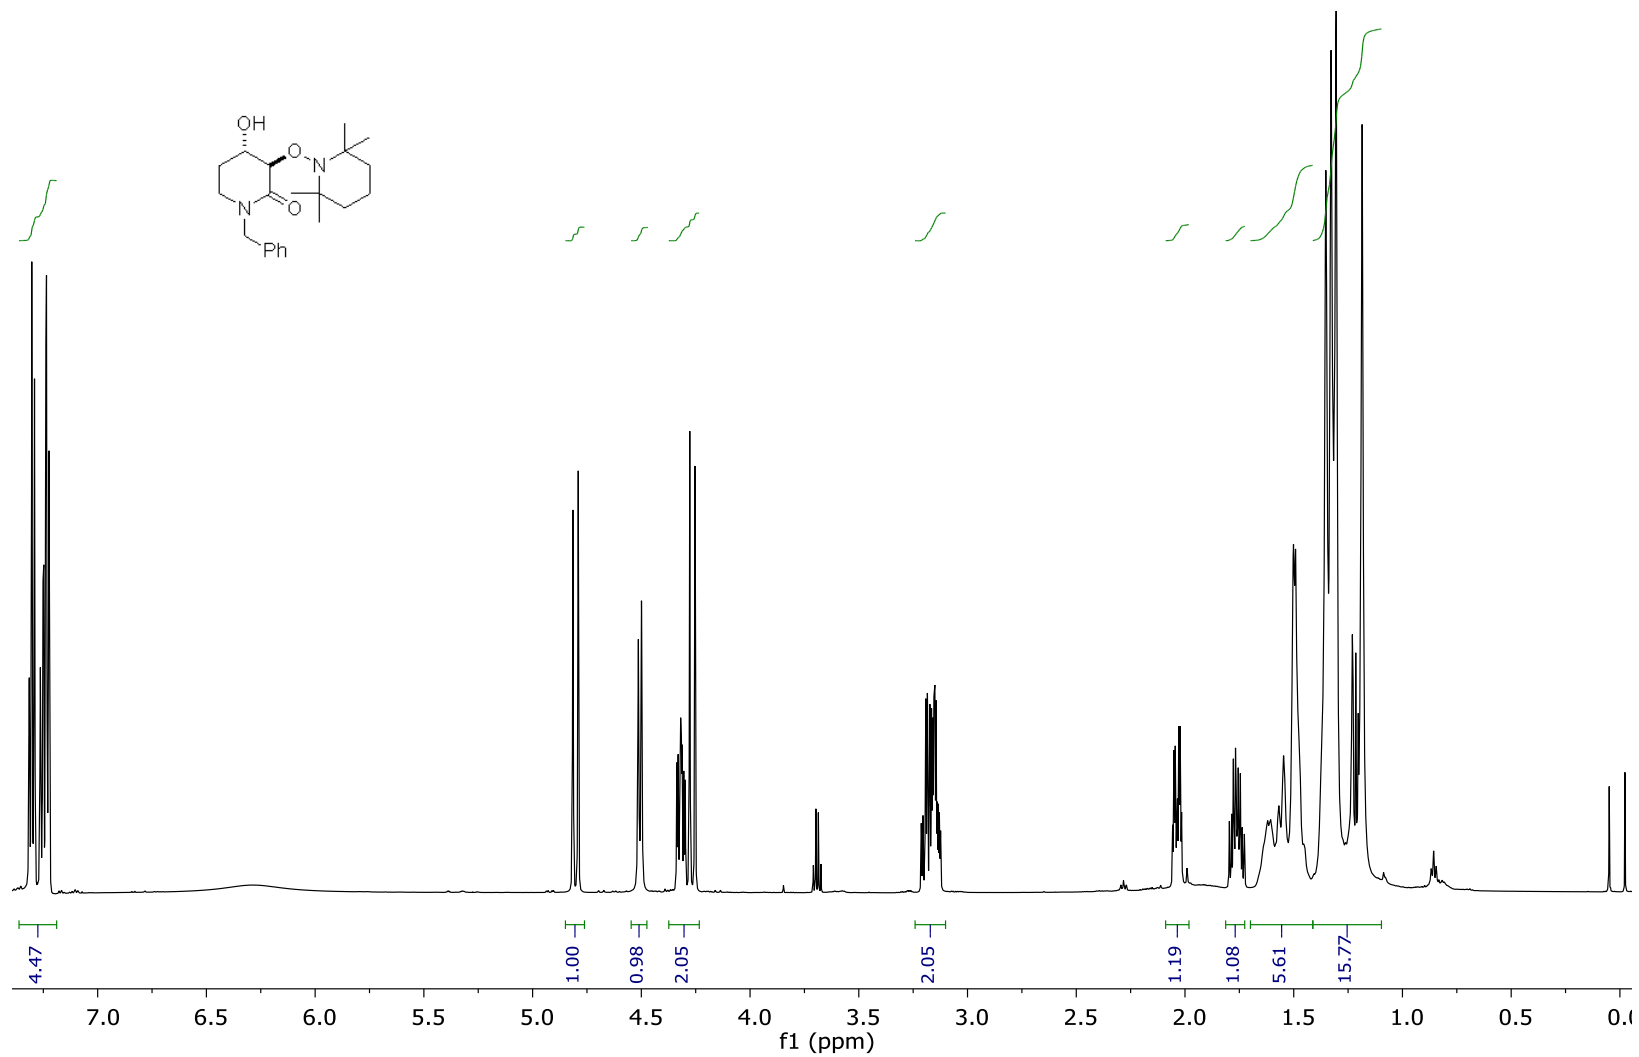

NMR spectra for 1-benzyl-4-hydroxy-3-((2,2,6,6-tetramethylpiperidin-1-yl)oxy)piperidin-2-one (*u*)-*trans*-3.

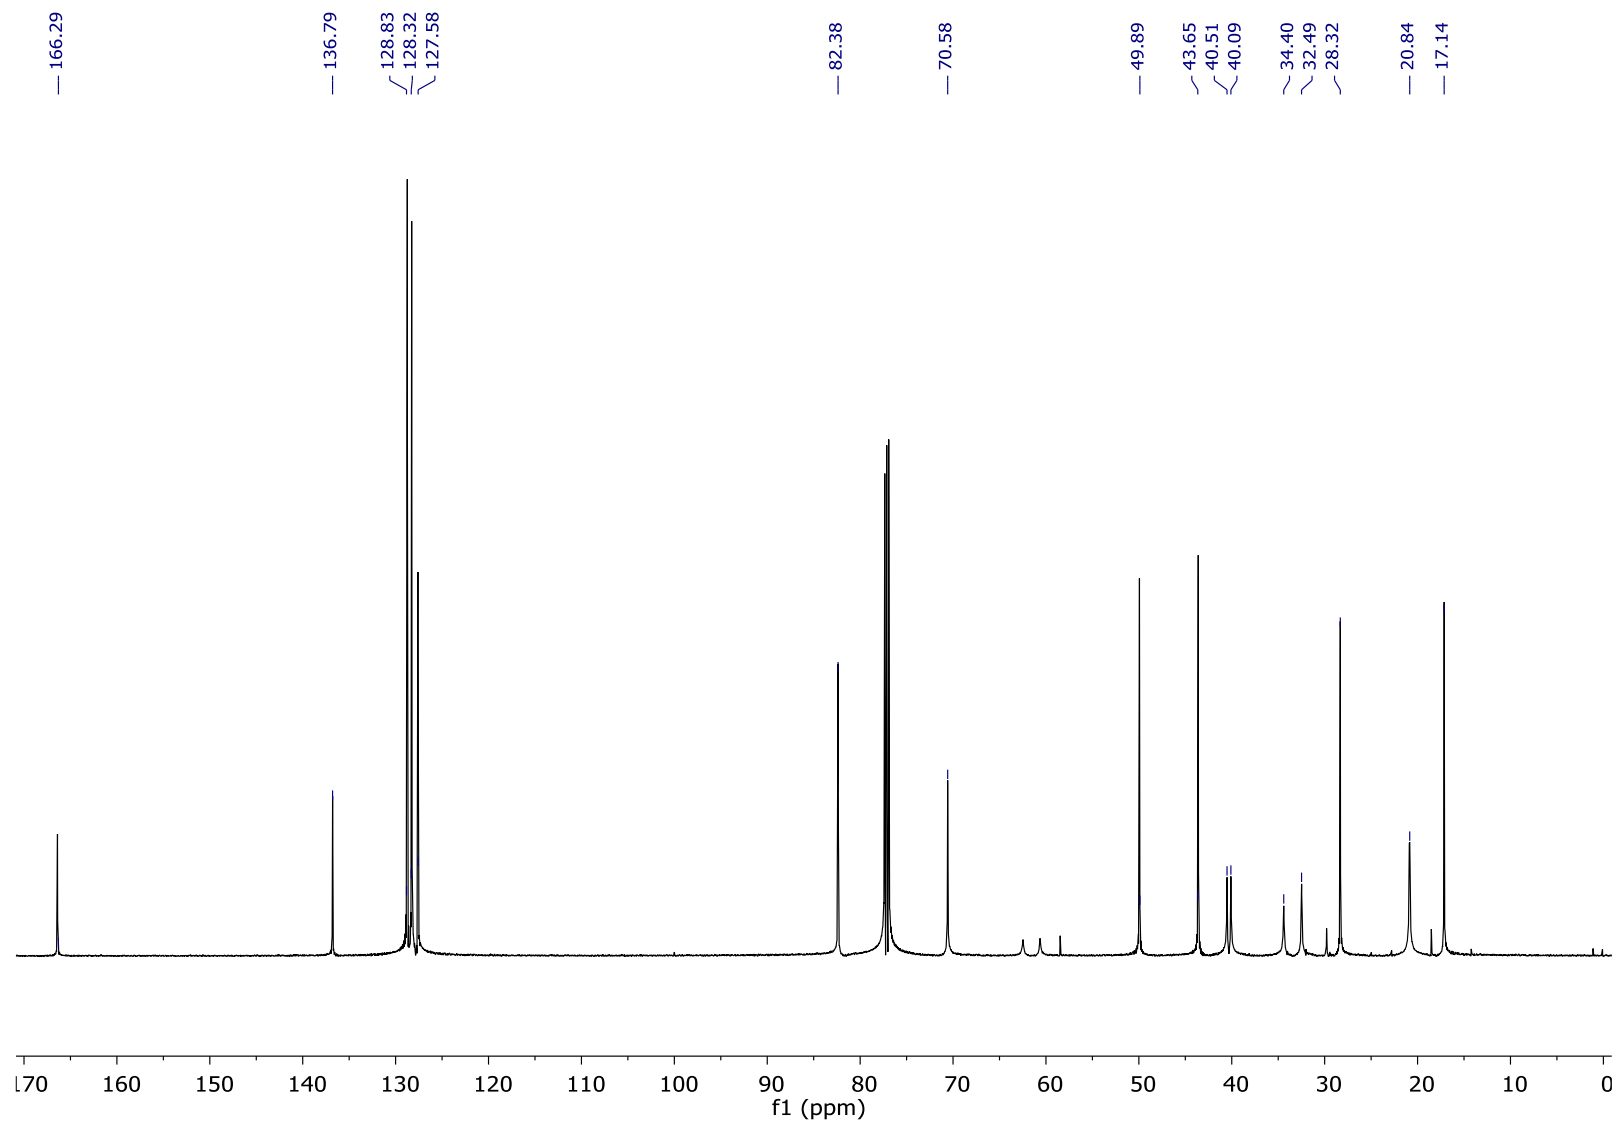

NMR spectra for 1-benzyl-4-hydroxy-3-((2,2,6,6-tetramethylpiperidin-1-yl)oxy)piperidin-2-one (*u*)-*trans*-3.

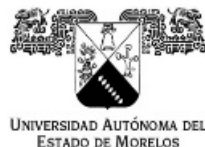

**Servicio de Espectrometría de Masas**  
**MStation JMS-700 JEOL Alta Resolución**  
Centro de Investigaciones Químicas UAEM  
Tel. 329-79-97 ext.6013

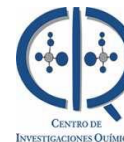

[ Elemental Composition ]

Data : JEG013

Date : 28-Oct-2021 11:34

Sample: JEG16-1P03

Operator name M.en ITA Victoria Labastida G.

Note : Dr.Escalante

Centro de Investigaciones Químicas UAEM

Inlet : Direct

Ion Mode : FAB+

RT : 1.19 min

Scan#: (4,36)

Elements : C 40/0, H 49/0, O 3/0, N 1/0

Mass Tolerance : 1000ppm, 3mmu if m/z < 3, 5mmu if m/z > 5

Unsaturation (U.S.) : -0.5 - 10.0

| Observed m/z | Int%  | Err[ppm / mmu] | U.S. | Composition     |
|--------------|-------|----------------|------|-----------------|
| 222.1142     | 100.0 | +5.5 / +1.2    | 5.5  | C 12 H 16 O 3 N |

NMR spectra for **1-benzyl-4-hydroxy-3-((2,2,6,6-tetramethylpiperidin-1-yl)oxy)piperidin-2-one** (*u*)-*trans*-3: HRMS (Fab<sup>+</sup>).

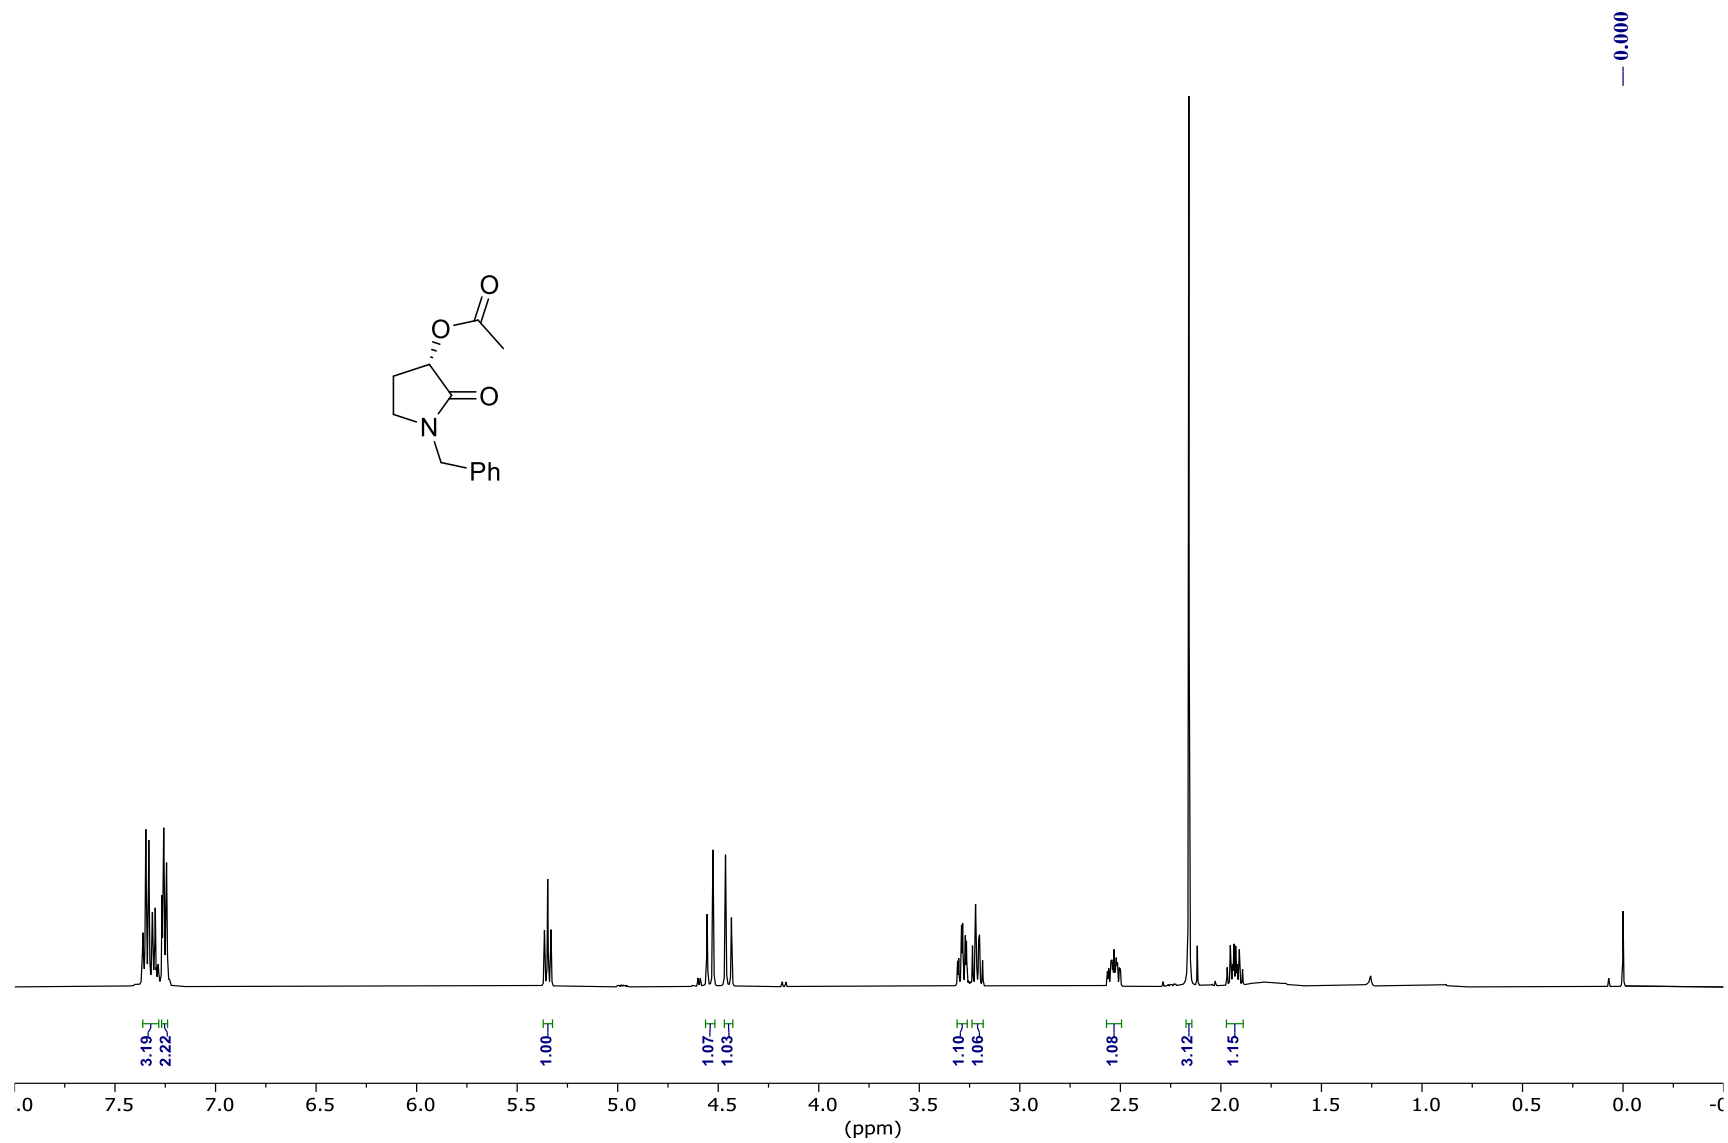

NMR spectra for (*S*)-1-Benzyl-2-oxopyrrolidin-3-yl acetate (*S*-4): <sup>1</sup>H-NMR (500 MHz, CDCl<sub>3</sub>).

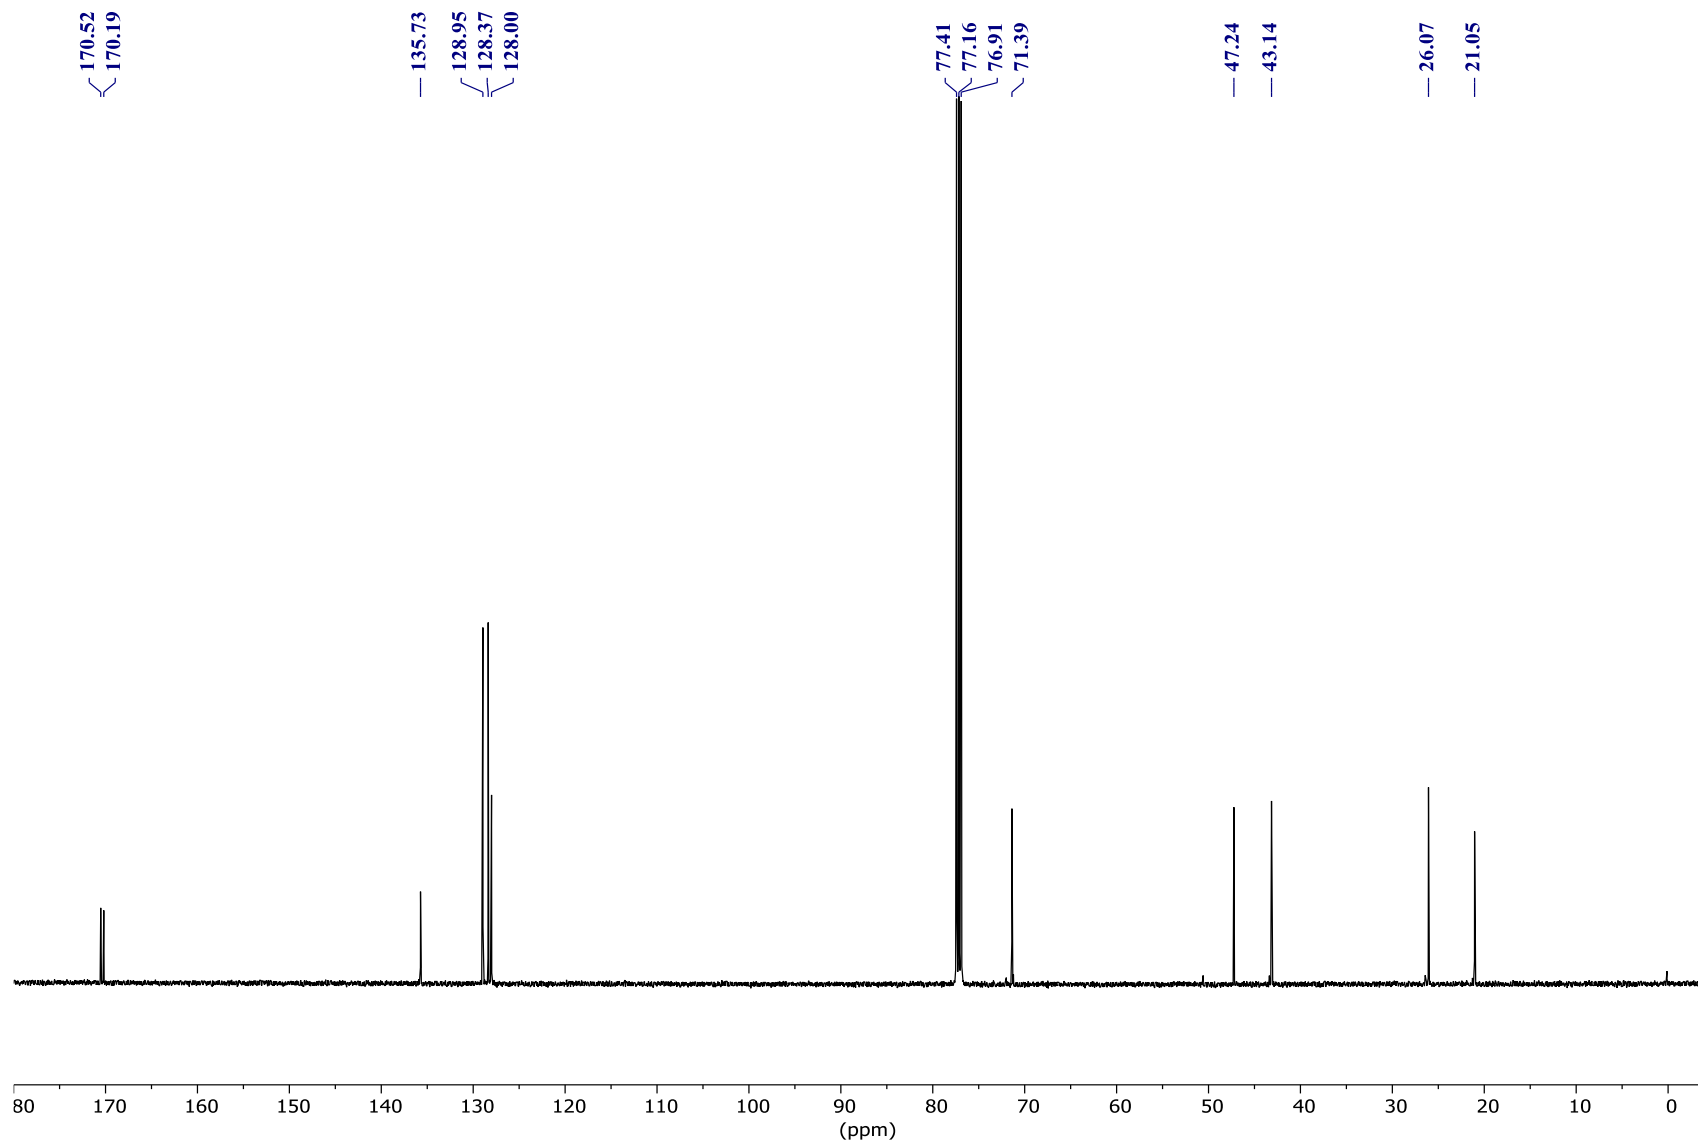

NMR spectra for (*S*)-1-Benzyl-2-oxopyrrolidin-3-yl acetate (*S*-4):  $^{13}\text{C}$ -NMR (125 MHz,  $\text{CDCl}_3$ ).

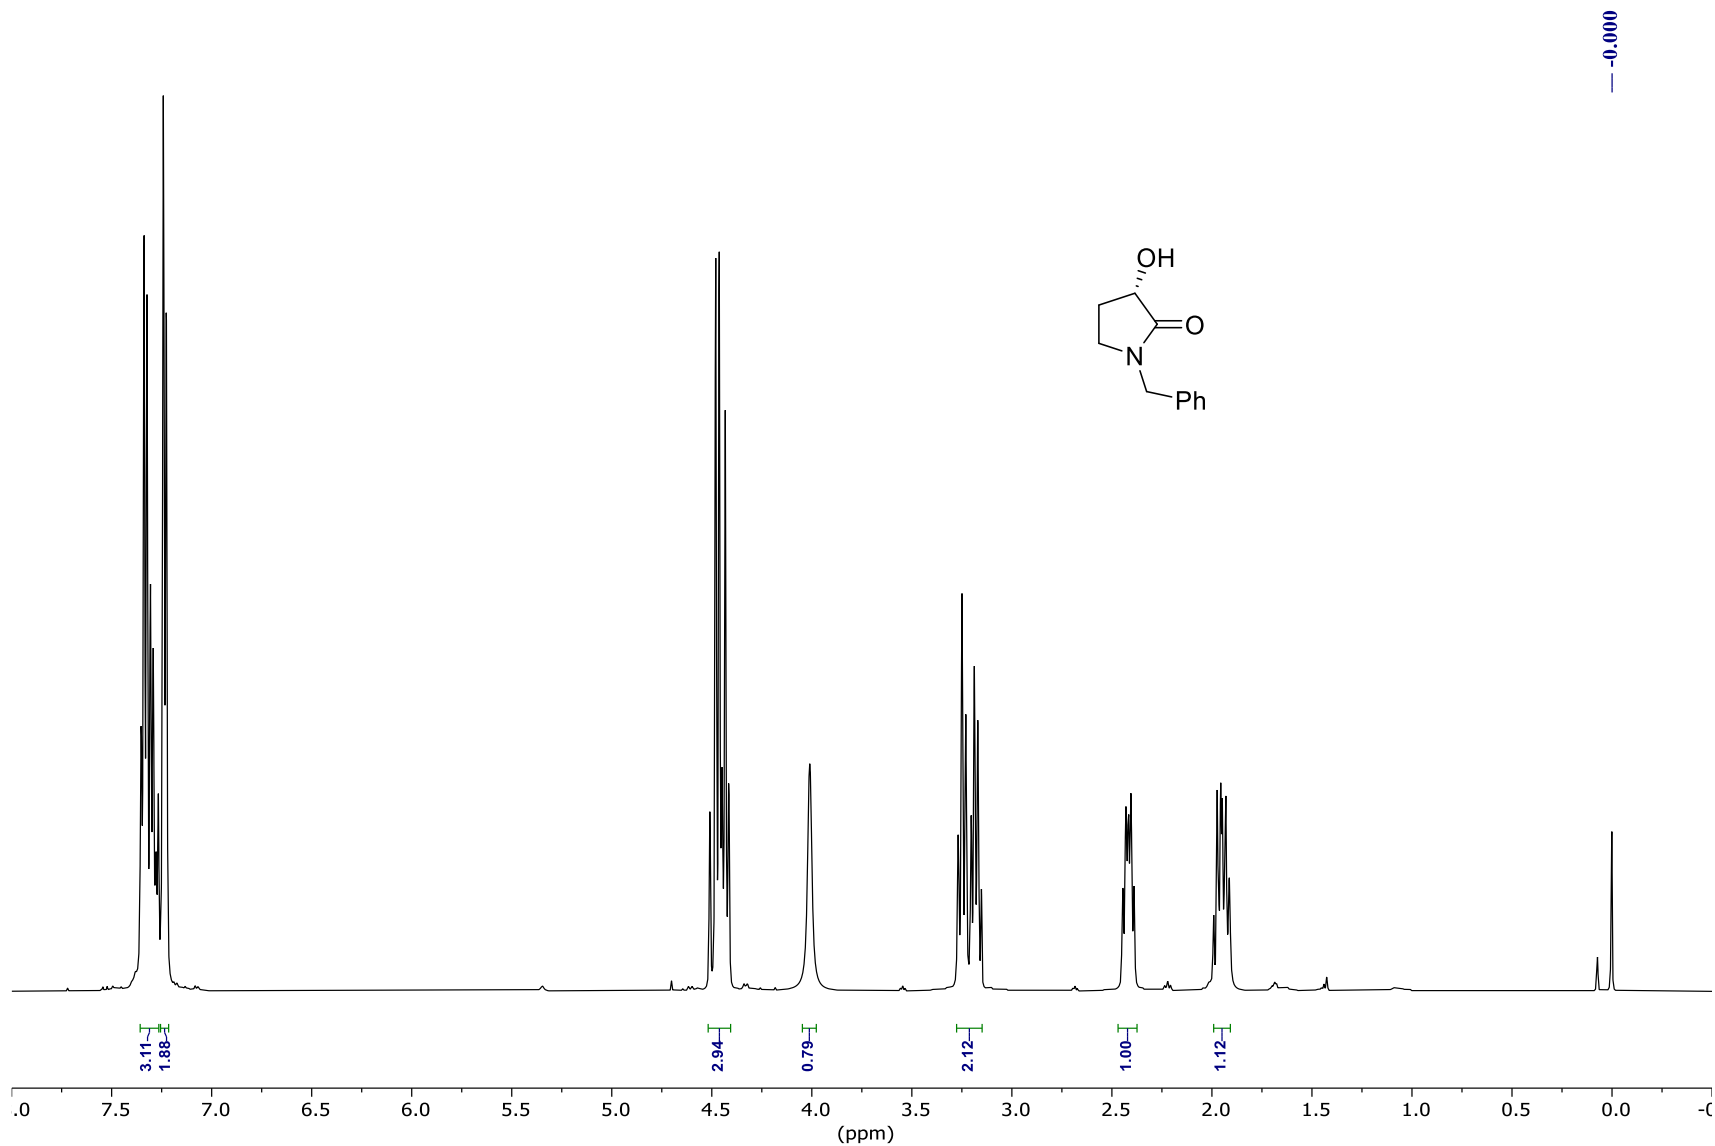

NMR spectra for (S)-1-Benzyl-3-hydroxypyrrolidin-2-one (*S*-5): <sup>1</sup>H-NMR (500 MHz, CDCl<sub>3</sub>).



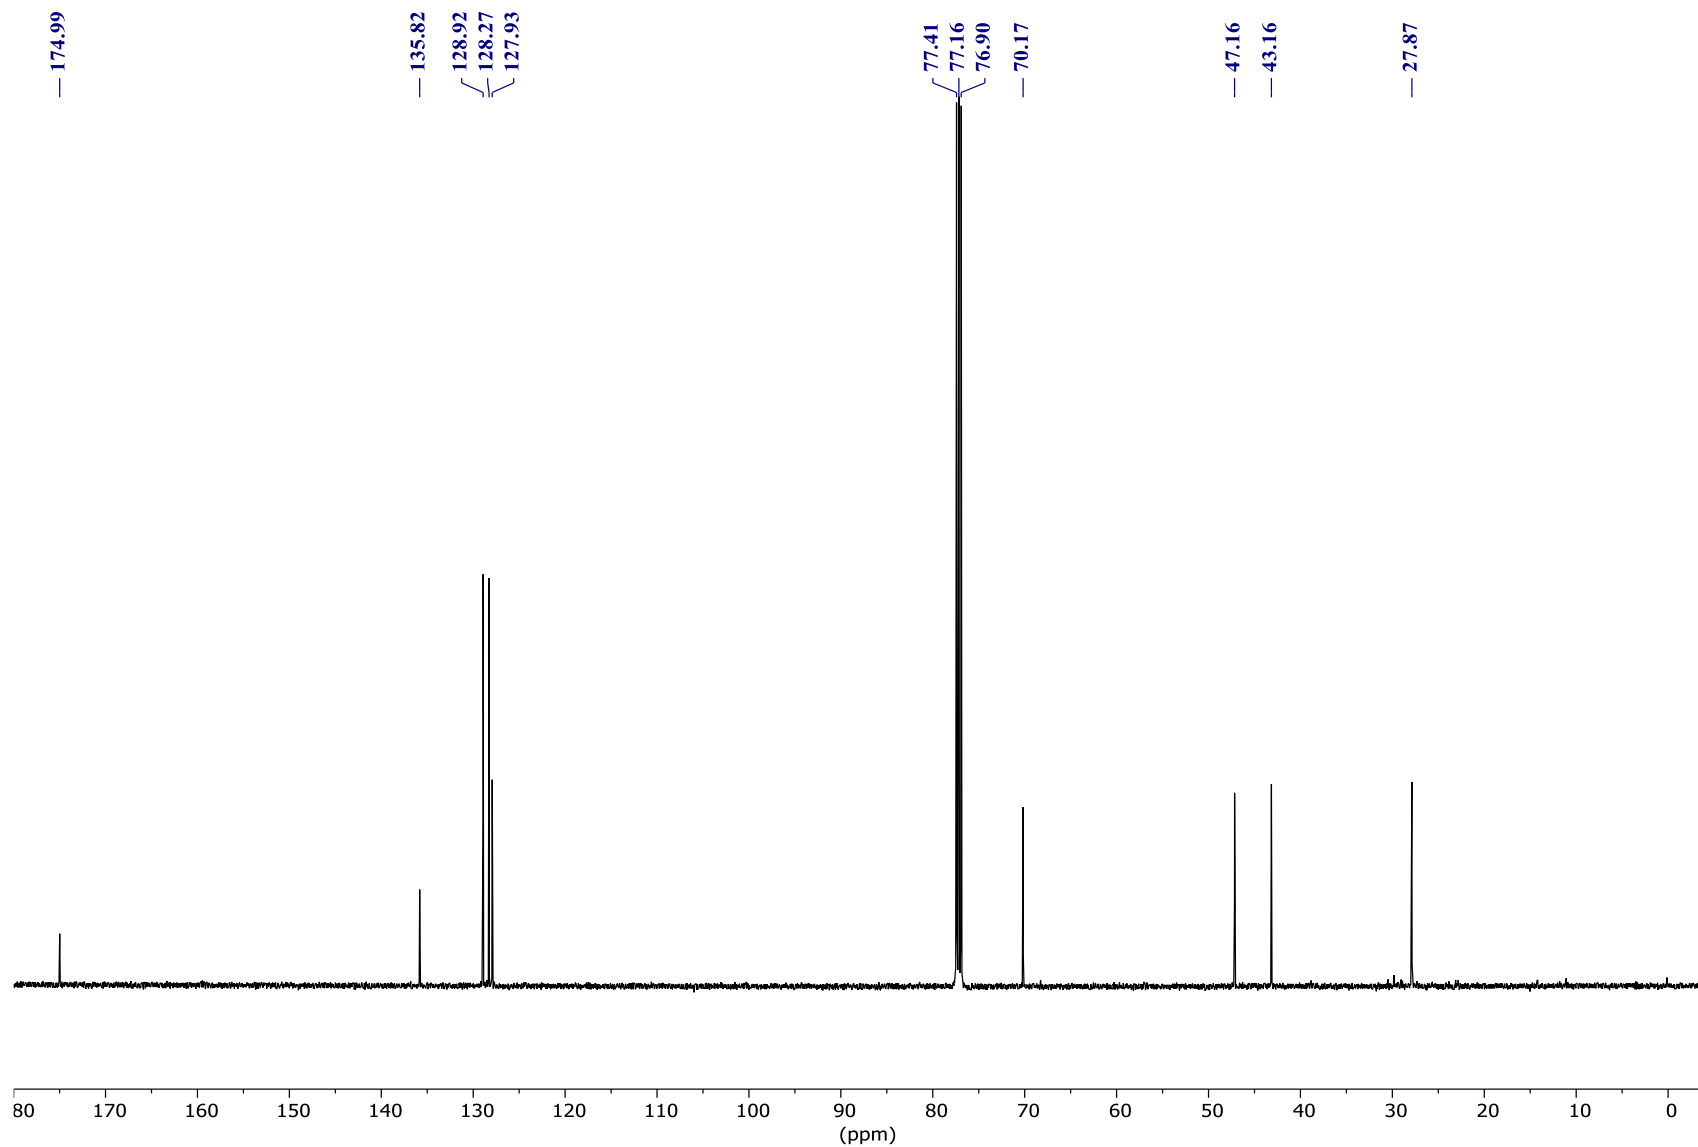

NMR spectra for (*S*)-1-Benzyl-3-hydroxypyrrolidin-2-one (*S*-5): <sup>13</sup>C-NMR (125 MHz, CDCl<sub>3</sub>).

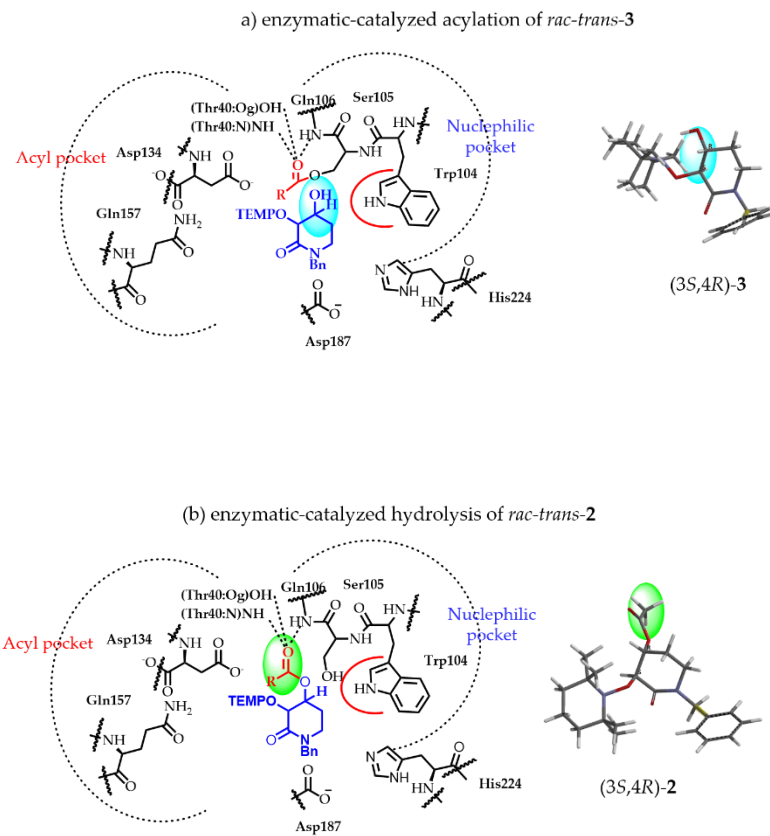

**Figure S1.** Schematic representation for: a) resolution of the *rac-trans*-3 as the second substrate (for enantiomer (3*S*,4*R*)) and b) resolution of the *rac-trans*-2 intermediate as the first substrate (for the fast-reacting enantiomer (3*S*,4*R*)-2).
